# Supplementary material for: Functional Domain Analysis of the Cell Division Inhibitor EzrA
Source: PubMed Central journal article supplement (PMC4113482; doi:10.1371/journal.pone.0102616), 2014-07-28

## Supporting Information

### Supporting Figure Legends

**Figure S1.** (A) Quantitative immunoblot of lysates from wild type and *ezrA* TM mutant cells. All constructs were expressed from the native promoter with the exception of *ezrA* $\Delta$ TM, which was expressed from the IPTG inducible *Pspachy* promoter. FtsZ loading control on bottom. Primary rabbit antisera raised against EzrA or FtsZ was detected using secondary anti-rabbit serum conjugated to horse radish peroxidase. (B) Immunoblot of membrane fractionation of wild type and *ezrA* TM mutant lysates. As expected, wild type EzrA and TM helix chimeras are concentrated in the membrane fraction. The TM-less mutant is only in the cytoplasmic fraction.

**Figure S2.** (A) Quantitative immunoblot of coiled-coil deletion constructs. FtsZ loading control on bottom. Note faint TM-QNR-GFP band on far right, consistent with degradation. (B) (Top three panels) Representative immunoblots of membrane fractionations from coiled-coil deletion strains. Three independent experiments are presented. Degradation over the course of the two-day assay, the latter steps of which were performed in the absence of protease inhibitors, led to variation in protein levels between experiments. Molecular weight marker is visible on far left of all three blots (whitish band). (Bottom) Soluble control (FtsZ). (C) Immunoblot of soluble fractions from coiled-coil deletion strains probed with anti-GFP sera (top) or anti-FtsZ sera (bottom). No GFP was visible in soluble fractions, consistent with membrane retention of all CC deletion mutants. Primary rabbit antibody against GFP (Genscript) or FtsZ was detected using secondary anti-rabbit serum conjugated to HRP.

**Figure S3.** (A) Micrographs of GFP fusions to wild type EzrA, the full length EzrA(R510D) mutant, and an EzrA deletion mutant [*ezrA* $\Delta$ (31-499)] that includes EzrA's native transmembrane helix and QNR patch but is missing all four coiled-coils. Note absence of medial localization in both the *ezrA*(R510D) and *ezrA* $\Delta$ (31-499) images. (B) FtsZ localization by immunofluorescence microscopy. Note the presence of polar FtsZ rings in the *ezrA* $\Delta$ (31-499) images. (A and B). Thick arrows indicate medial EzrA and FtsZ localization. Thin arrows indicate EzrA localization at septa. Arrowheads indicate polar FtsZ rings. Exposure times are equivalent for each fluorophore. Bars = 5 $\mu$ m. (C) Consistent with loss of medial localization, the *ezrA* $\Delta$ (31-499) allele is equivalent to an *ezrA* null with regard to its ability to suppress the lethality associated with overexpression of the MinCD inhibitor or the heat sensitivity of the *ftsZts* allele. Bars equal standard deviation from three repeated experiments.



## Supporting References

1. Jaacks KJ, Healy J, Losick R, Grossman AD (1989) Identification and characterization of genes controlled by the sporulation-regulatory gene *spo0H* in *Bacillus subtilis*. *J Bacteriol* 171: 4121–4129.
2. Levin PA, Kurtser IG, Grossman AD (1999) Identification and characterization of a negative regulator of FtsZ ring formation in *Bacillus subtilis*. *Proc Natl Acad Sci USA* 96: 9642–9647.
3. Levin PA, Schwartz RL, Grossman AD (2001) Polymer stability plays an important role in the positional regulation of FtsZ. *J Bacteriol* 183: 5449–5452.
4. Weart RB, Nakano S, Lane BE, Zuber P, Levin PA (2005) The ClpX chaperone modulates assembly of the tubulin-like protein FtsZ. *Mol Microbiol* 57: 238–249. doi:10.1111/j.1365-2958.2005.04673.x.
5. Haeusser DP, Garza AC, Buscher AZ, Levin PA (2007) The division inhibitor EzrA contains a seven-residue patch required for maintaining the dynamic nature of the medial FtsZ ring. *J Bacteriol* 189: 9001–9010. doi:10.1128/JB.01172-07.
6. Ireton K, Rudner DZ, Siranosian KJ, Grossman AD (1993) Integration of multiple developmental signals in *Bacillus subtilis* through the Spo0A transcription factor. *Genes Dev* 7: 283–294.
7. Quisel JD, Burkholder WF, Grossman AD (2001) In vivo effects of sporulation kinases on mutant Spo0A proteins in *Bacillus subtilis*. *J Bacteriol* 183: 6573–6578. doi:10.1128/JB.183.22.6573-6578.2001.
8. LeDeaux JR, Grossman AD (1995) Isolation and characterization of *kinC*, a gene that encodes a sensor kinase homologous to the sporulation sensor kinases KinA and KinB in *Bacillus subtilis*. *J Bacteriol* 177: 166–175.

**Table S1. Bacterial Strains Used in this Study**

| <b><i>B. subtilis</i> strains</b> | <b>Genotype</b>                                                        | <b>Reference</b> |
|-----------------------------------|------------------------------------------------------------------------|------------------|
| JH642                             | <i>B. subtilis</i> trpC2 pheA1                                         | [1]              |
| PL874                             | JH642 <i>ftsZ::ftsZ-gfp spc</i>                                        | [2]              |
| PL642                             | JH642 <i>ftsZ::ftsZ-gfp cat</i>                                        | [2]              |
| PL1138                            | JH642 <i>amyE::P<sub>spachy</sub>-minCD cat</i>                        | [3]              |
| PL1145                            | JH642 <i>thrC::P<sub>spachy</sub>-minCD MLS</i>                        | [4]              |
| PL982                             | JH642 <i>amyE::P<sub>spac</sub>-ftsZ-gfp cat</i>                       | This work        |
| PL851                             | PL847 <i>ezrA-gfp, P<sub>spac</sub>-ftsZ</i>                           | [2]              |
| PL1776                            | JH642 <i>ezrA::ezrA(R510D)-gfp spc</i>                                 | [5]              |
| PL2104                            | JH642 <i>thrC::P<sub>spac</sub>-ftsZ-gfp MLS</i>                       | This work        |
| PL3040                            | JH642 <i>amyE::P<sub>spachy</sub>-ezrAΔTM cat</i>                      | This work        |
| PL3054                            | JH642 <i>amyE::P<sub>spachy</sub>-ezrAΔTM cat, ftsZ::ftsZ-gfp spc</i>  | This work        |
| PL2719                            | JH642 <i>ezrA TM::cccA TM spc</i>                                      | This work        |
| PL2725                            | JH642 <i>ezrA TM::cccA TM spc, amyE::P<sub>spac</sub>-ftsZ-gfp cat</i> | This work        |

|        |                                                                                                                      |           |
|--------|----------------------------------------------------------------------------------------------------------------------|-----------|
| PL2723 | JH642 <i>ezrA</i> TM:: <i>cccA</i> TM spc, <i>amyE</i> ::P <sub><i>spachy</i></sub> <sup>-</sup><br><i>minCD</i> cat | This work |
| PL2721 | JH642 <i>ezrA</i> TM:: <i>cccA</i> TM spc, <i>ftsZ</i> :: <i>ftsZ-gfp</i> cat                                        | This work |
| PL2741 | JH642 <i>ezrA</i> TM:: <i>ftsK</i> TM spc                                                                            | This work |
| PL2745 | JH642 <i>ezrA</i> TM:: <i>ftsK</i> TM spc, <i>amyE</i> ::P <sub><i>spac</i></sub> - <i>ftsZ-gfp</i><br>cat           | This work |
| PL2743 | JH642 <i>ezrA</i> TM:: <i>ftsK</i> TM spc, <i>amyE</i> ::P <sub><i>spachy</i></sub> - <i>minCD</i><br>cat            | This work |
| PL2744 | JH642 <i>ezrA</i> TM:: <i>ftsK</i> TM spc, <i>ftsZ</i> :: <i>ftsZ-gfp</i> cat                                        | This work |
| PL2748 | JH642 <i>ezrA</i> TM:: <i>sdhA</i> TM spc                                                                            | This work |
| PL2751 | JH642 <i>ezrA</i> TM:: <i>sdhA</i> TM spc, <i>amyE</i> ::P <sub><i>spac</i></sub> - <i>ftsZ-gfp</i><br>cat           | This work |
| PL2749 | JH642 <i>ezrA</i> TM:: <i>sdhA</i> TM spc, <i>amyE</i> ::P <sub><i>spachy</i></sub> <sup>-</sup><br><i>minCD</i> cat | This work |
| PL2750 | JH642 <i>ezrA</i> TM:: <i>sdhA</i> TM spc, <i>ftsZ</i> :: <i>ftsZ-gfp</i> cat                                        | This work |
| PL1548 | JH642 <i>ezrA</i> TM:: <i>zipA</i> TM spc                                                                            | This work |
| PL2692 | JH642 <i>ezrA</i> TM:: <i>zipA</i> TM spc, <i>amyE</i> ::P <sub><i>spac</i></sub> - <i>ftsZ-gfp</i><br>cat           | This work |
| PL2701 | JH642 <i>ezrA</i> TM:: <i>zipA</i> TM spc, <i>amyE</i> ::P <sub><i>spachy</i></sub> <sup>-</sup><br><i>minCD</i> cat | This work |
| PL2647 | JH642 <i>ezrA</i> TM:: <i>zipA</i> TM spc, <i>ftsZ</i> :: <i>ftsZ-gfp</i> cat                                        | This work |
| PL2694 | JH642 <i>ezrA</i> TM:: <i>zipA</i> TM spc, <i>thrC</i> ::P <sub><i>spac</i></sub> - <i>ftsZ-gfp</i><br>MLS           | This work |

|        |                                                                                                 |           |
|--------|-------------------------------------------------------------------------------------------------|-----------|
| PL3042 | JH642 <i>ezrA::ezrA-gfp</i> spc, <i>amyE::P<sub>spachy</sub>-minCD</i> cat                      | This work |
| PL3114 | JH642 <i>ezrA::ezrA-gfp</i> spc, <i>ftsZ::ftsZ-gfp</i> cat                                      | This work |
| PL2734 | JH642 <i>ezrA::ezrA-cfp</i> cat, <i>thrC::P<sub>spac</sub>-ftsZ-gfp</i> MLS                     | This work |
| PL2752 | JH642 <i>ezrA::kan kan</i> , <i>amyE::P<sub>spac</sub>-ftsZ-gfp</i> cat                         | This work |
| PL2533 | JH642 <i>ezrA::kan kan</i> , <i>amyE::P<sub>spachy</sub>-minCD</i> cat                          | This work |
| PL2642 | JH642 <i>ezrA::kan kan</i> , <i>ftsZ::ftsZ-gfp</i> cat                                          | This work |
| PL2543 | JH642 <i>ezrA::kan kan</i> , <i>thrC::P<sub>spachy</sub>-minCD</i> MLS                          | This work |
| PL2982 | JH642 <i>ezrA::P<sub>spachy</sub>-ezrAΔTM</i> cat, <i>amyE::P<sub>spachy</sub>-ezrA-spc</i> spc | This work |
| PL2700 | JH642 <i>ezrA::P<sub>spachy</sub>-ezrAΔTM</i> cat, <i>ftsZ::ftsZ-gfp</i> spc                    | This work |
| PL2690 | JH642 <i>ezrA::P<sub>spachy</sub>-ezrAΔTM</i> cat, <i>thrC::P<sub>spac</sub>-ftsZ-gfp</i> MLS   | This work |
| PL2681 | JH642 <i>ezrA::P<sub>spachy</sub>-ezrAΔTM</i> cat, <i>thrC::P<sub>spac</sub>-minCD</i> MLS      | This work |
| PL2611 | JH642 <i>ezrAΔ(31-353)</i> spc                                                                  | This work |
| PL2715 | JH642 <i>ezrAΔ(31-353)-gfp</i> spc cat                                                          | This work |
| PL3051 | JH642 <i>ezrAΔ(31-353)-gfp</i> , <i>thrC::P<sub>spachy</sub>-minCD</i>                          | This work |
| PL2686 | JH642 <i>ezrAΔ(31-353)</i> , <i>amyE::P<sub>spac</sub>-ftsZ-gfp</i>                             | This work |

|        |                                                                                             |           |
|--------|---------------------------------------------------------------------------------------------|-----------|
| PL2682 | JH642 <i>ezrA</i> Δ(31-353), <i>amyE</i> ::P <sub>spachy</sub> - <i>minCD</i>               | This work |
| PL2613 | JH642 <i>ezrA</i> Δ(31-353), <i>ftsZ</i> :: <i>ftsZ-gfp</i>                                 | This work |
| PL2688 | JH642 <i>ezrA</i> Δ(31-353), <i>thrC</i> ::P <sub>spac</sub> - <i>ftsZ-gfp</i>              | This work |
| PL2705 | JH642 <i>ezrA</i> Δ(31-499)                                                                 | This work |
| PL2713 | JH642 <i>ezrA</i> Δ(31-499)- <i>gfp</i>                                                     | This work |
| PL3052 | JH642 <i>ezrA</i> Δ(31-499)- <i>gfp</i> , <i>thrC</i> ::P <sub>spachy</sub> - <i>minCD</i>  | This work |
| PL2711 | JH642 <i>ezrA</i> Δ(31-499), <i>amyE</i> ::P <sub>spac</sub> - <i>ftsZ-gfp</i>              | This work |
| PL2709 | JH642 <i>ezrA</i> Δ(31-499), <i>amyE</i> ::P <sub>spachy</sub> - <i>minCD</i>               | This work |
| PL2707 | JH642 <i>ezrA</i> Δ(31-499), <i>ftsZ</i> :: <i>ftsZ-gfp</i>                                 | This work |
| PL3017 | JH642 <i>ezrA</i> Δ(191-353)                                                                | This work |
| PL3019 | JH642 <i>ezrA</i> Δ(191-353)- <i>gfp</i>                                                    | This work |
| PL3053 | JH642 <i>ezrA</i> Δ(191-353)- <i>gfp</i> , <i>thrC</i> ::P <sub>spachy</sub> - <i>minCD</i> | This work |
| PL3119 | JH642 <i>ezrA</i> Δ(191-353), <i>ftsZ</i> :: <i>ftsZ-gfp</i>                                | This work |
| PL3045 | JH642 <i>ezrA</i> Δ(376-434)- <i>gfp</i> , <i>amyE</i> ::P <sub>spachy</sub> - <i>minCD</i> | This work |
| PL3116 | JH642 <i>ezrA</i> Δ(376-434)- <i>gfp</i> , <i>ftsZ</i> :: <i>ftsZ-gfp</i>                   | This work |

|                                   |                                                                                                    |                  |
|-----------------------------------|----------------------------------------------------------------------------------------------------|------------------|
| PL3023                            | JH642 <i>ezrA</i> Δ(377-493)- <i>gfp</i>                                                           | This work        |
| PL3044                            | JH642 <i>ezrA</i> Δ(377-493)- <i>gfp</i> , <i>amyE</i> ::P <sub><i>spachy</i></sub> - <i>minCD</i> | This work        |
| PL3120                            | JH642 <i>ezrA</i> Δ(377-493)- <i>gfp</i> , <i>ftsZ</i> - <i>gfp</i>                                | This work        |
| PL2636                            | JH642 <i>ezrA</i> Δ(377-562)                                                                       | This work        |
| PL872                             | JH642 <i>ezrA</i> Δ(377-562)- <i>gfp</i>                                                           | This work        |
| PL3043                            | JH642 <i>ezrA</i> Δ(377-562)- <i>gfp</i> , <i>amyE</i> ::P <sub><i>spachy</i></sub> - <i>minCD</i> | This work        |
| PL3115                            | JH642 <i>ezrA</i> Δ(377-562)- <i>gfp</i> , <i>ftsZ</i> - <i>gfp</i>                                | This work        |
| PL2696                            | JH642 <i>ezrA</i> Δ(377-562), <i>amyE</i> ::P <sub><i>spac</i></sub> - <i>ftsZ</i> - <i>gfp</i>    | This work        |
| PL2684                            | JH642 <i>ezrA</i> Δ(377-562), <i>amyE</i> ::P <sub><i>spachy</i></sub> - <i>minCD</i>              | This work        |
| PL2614                            | JH642 <i>ezrA</i> Δ(377-562), <i>ftsZ</i> :: <i>ftsZ</i> - <i>gfp</i>                              | This work        |
| PL2652                            | JH642 <i>ezrA</i> Δ(377-562), <i>ftsZ</i> :: <i>ftsZ</i> - <i>gfp</i>                              | This work        |
| PL2698                            | JH642 <i>ezrA</i> Δ(377-562), <i>thrC</i> ::P <sub><i>spac</i></sub> - <i>ftsZ</i> - <i>gfp</i>    | This work        |
| PL3046                            | JH642 <i>ezrA</i> Δ(468-504)- <i>gfp</i> , <i>amyE</i> ::P <sub><i>spachy</i></sub> - <i>minCD</i> | This work        |
| PL3117                            | JH642 <i>ezrA</i> Δ(468-504)- <i>gfp</i> , <i>ftsZ</i> - <i>gfp</i>                                | This work        |
| <b><i>E. coli</i><br/>strains</b> | <b>Genotype</b>                                                                                    | <b>Reference</b> |



|        |                                                                                                                                                                                                                                        |            |
|--------|----------------------------------------------------------------------------------------------------------------------------------------------------------------------------------------------------------------------------------------|------------|
| AG1111 | DZR200=MC1061 F'/lacIQ lacZM15 Tn10 tet                                                                                                                                                                                                | [6]        |
| Top10  | F- <i>mcrA</i> $\Delta$ ( <i>mrr-hsdRMS-mcrBC</i> ) $\phi$ 80lacZ $\Delta$ M15<br>$\Delta$ lacX74 <i>nupG</i> <i>recA1</i> <i>araD139</i> $\Delta$ ( <i>ara-leu</i> )7697<br><i>galE15 galK16 rpsL</i> (StrR) <i>endA1</i> $\lambda$ - | Invitrogen |
| LMG194 | F- $\Delta$ lacX74 <i>galE</i> <i>thi rpsL</i> $\Delta$ <i>phoA</i> (Pvu II) $\Delta$ <i>ara714</i><br><i>leu::Tn10</i>                                                                                                                | Invitrogen |

**Table S2. Plasmids used in this study**

| <b>Plasmid</b> | <b>Genotype</b>                                                           | <b>Reference</b>    |
|----------------|---------------------------------------------------------------------------|---------------------|
| pBAD           | Overexpression vector for N-terminal His thioredoxin fusion               | Life Technologies   |
| pUS19          | Integrational plasmid for spectinomycin resistance for <i>B. subtilis</i> | New England Biolabs |
| pPL82          | $P_{spachy}$ integration vector                                           | [7]                 |
| pJL74          | Shuttle plasmid replicating in both <i>E. coli</i> and <i>B. subtilis</i> | [8]                 |
| pRS3           | QuickChange Site Mutagenesis                                              | Stratagene          |
| pPL65          | pUS19: ~900-bp 3' <i>ezrA</i> fragment fused to <i>gfp</i>                | [2]                 |
| pPL3090        | pBAD/Thio- <i>ezra</i> Δ(1-203)-His                                       | This work           |
| pPL2984        | pBAD/Thio- <i>ezra</i> Δ(191-353)-His                                     | This work           |
| pPL2829        | pBAD/Thio- <i>ezra</i> Δ(376-434)-His                                     | This work           |
| pPL2883        | pBAD/Thio- <i>ezra</i> Δ(468-504)-His                                     | This work           |
| pPL3094        | pBAD/Thio- <i>ezra</i> Δ(468-562)-His                                     | This work           |
| pPL2998        | pBAD/Thio- <i>ezra</i> Δ(501-511)-His                                     | This work           |
| pPL2780        | pBAD/Thio- <i>ezra</i> (494-562)-His (Thio-QNR-His)                       | This work           |
| pPL2784        | pBAD/Thio-QNR(R510D)-His                                                  | This work           |

|         |                                                            |           |
|---------|------------------------------------------------------------|-----------|
| pPL2609 | pJL74: <i>ezra</i> $\Delta$ (31-353)                       | This work |
| pPL2986 | pJL74: <i>ezra</i> $\Delta$ (191-353)                      | This work |
| pPL2703 | pJL74: <i>ezra</i> $\Delta$ (31-499)                       | This work |
| pPL2607 | pJL74: <i>ezra</i> $\Delta$ (377-562)                      | This work |
| pPL1232 | pJL74:~900-bp 3' <i>ezrA</i> fragment fused to <i>gfp</i>  | This work |
| pDH26   | pUS19: <i>ezra</i> $\Delta$ (376-434)- <i>gfp</i>          | This work |
| pDH27   | pUS19: <i>ezra</i> $\Delta$ (468-504)- <i>gfp</i>          | This work |
| pPL69   | pUS19: <i>ezra</i> $\Delta$ (377-562)- <i>gfp</i>          | This work |
| pPAP1   | pJL74: <i>ezra</i> TM:: <i>zip</i> ATM                     | This work |
| pPL2717 | pJL74: <i>ezra</i> TM:: <i>ccc</i> ATM                     | This work |
| pPL2739 | pJL74: <i>ezra</i> TM:: <i>ftsK</i> TM                     | This work |
| pPL2746 | pJL74: <i>ezra</i> TM:: <i>sdh</i> ATM                     | This work |
| pPL3038 | pPL82:P <sub><i>spachy</i></sub> - <i>ezra</i> $\Delta$ TM | This work |

**Table S3. Primers used in this study**

|                   |                                                       |
|-------------------|-------------------------------------------------------|
|                   | <b>Cloning <i>ezrA</i> full length to TOPO vector</b> |
| PLO 99            | ATCTACGCCGAAATCGACCGGCTG                              |
| PLO 141           | AGCGGATATGTCAGCTTTGATTTTTTC                           |
|                   | <b>Cloning N-<i>ezrA</i> to TOPO vector</b>           |
| PLO 99            | ATCTACGCCGAAATCGACCGGCTG                              |
| PLO 147           | GGCGACATGCTCTGCATCAAGC                                |
|                   | <b>Cloning C-<i>ezrA</i> to TOPO vector</b>           |
| PLO 102           | AGGCTGACAGCCGGTGAGCTCGGC                              |
| PLO 141           | AGCGGATATGTCAGCTTTGATTTTTTC                           |
|                   | <b><i>ezrA</i> deletion</b>                           |
| PLO <i>ezrAF1</i> | GATAGGAAGAGTCTGTGC                                    |

|                                       |                                        |
|---------------------------------------|----------------------------------------|
| PLO <i>ezrAR1</i> -<br>BamHI          | GATC GGATCC ACAAACTCCATAATGAGC         |
| PLO <i>ezrA</i> -<br>F2-HindIII       | GATC AAGCTT TCCGCTTAGATAATCACG         |
| PLO <i>ezrA</i> -<br>R2               | CGGCCTTGTCACATCTTG                     |
|                                       | <b><i>ezrA</i> N-terminus deletion</b> |
| PLO 990<br><i>ezrA</i> -F1-Sall       | GATC GTCGAC GGCATAGATAGGAAGAGTCTGTGC   |
| PLO 991<br><i>ezrA</i> -R1-<br>EcoRI  | GATC GAATTC TCCAATGACAACTCCATAATGA     |
| PLO 992<br><i>ezrA</i> -F3-SpeI-<br>2 | GATC ACTAGT AAAGCGCCTTGATGAAATTG       |
| PLO 993<br><i>ezrA</i> -R3-SacI       | GATC GAGCTC TTACACTGCGGGCTCTTTT        |
|                                       | <b><i>ezrA</i> C-terminus deletion</b> |
| PLO 994<br><i>ezrA</i> -F2-Sall       | GATC GTCGAC CCTGAGAGATTAAGGTAAACAGCA   |
| PLO 995<br><i>ezrA</i> -R2-<br>EcoRI  | GATC GAATTC TGAGTAGGCGACATGCTCTG       |

|                                            |                                          |
|--------------------------------------------|------------------------------------------|
| PLO 1019<br><i>ezrA</i> -R2-<br>EcoRI-stop | GATC GAATTC TGA CTAGGCGACATGCTCTG        |
| PLO 996<br><i>ezrA</i> -F4-SpeI            | GATC ACTAGT GCTGACATATCCGCTTAGATAATCA    |
| PLO 997<br><i>ezrA</i> -R4-SacI            | GATC GAGCTC TACTCGGAGCAGCGATTACA         |
|                                            | <b><i>ezrA</i> promoter and TM</b>       |
| PLO 1017<br>promoter+TM-<br>F-BamHI        | GATC GGATCC CGCTTTTGCATTGATGTCAC         |
| PLO 1018<br>promoter+TM-<br>R-SpeI         | GATC ACTAGT TCGATTTTCGGCGTAGATTTT        |
|                                            | <b><i>ezrA</i> CC2 deletion</b>          |
| del498-986                                 | TTGAAGAAGAAACAGAAAGGCGGAAAAAAGCGCCTTGATG |
| del498-986-<br>antisense                   | CATCAAGGCGCTTTTTTCCGCCTTCTGTTTCTTCTTCAA  |
|                                            | <b><i>ezrA</i> CC3 deletion</b>          |
| PLO 419                                    | CTTGATGCAGAGCATGTCACTAGCAACATTCCAGGC     |
| PLO 420                                    | GCCTGGAATGTTGCTAGTGACATGCTGTGCATCAAG     |

|                                  |                                               |
|----------------------------------|-----------------------------------------------|
|                                  | <b>ezrA CC4 deletion</b>                      |
| PLO 421                          | CAACTAAACGAACTTCCAATTCAGTTCGGAAACCGG          |
| PLO 422                          | CCGGTTTCCGAACTGAATTGGAAGTTCGTTTAGTTG          |
|                                  | <b>ezrA CC1 &amp; CC2 deletion</b>            |
| F- <i>ezrA</i> -Swal             | GATC ATTTAAATCACCTGACAGATTAAGGTAAAC           |
| R- <i>ezrA</i> -NdeI             | GATC CATATGTTAAGCGGATATGTCAGCTTTG             |
|                                  | <b>ezrA CC3 &amp; CC4 deletion</b>            |
| PLO 1059<br><i>ezrA</i> -F5-PstI | GATC CTGCAG CTT GTC GAG CAG GTC ATC CT        |
| PLO 1060<br><i>ezrA</i> -R5-PstI | GATC CTGCAG TGA TTA TCT AAG CGG ATA TGT CAG C |
| PLO 1061<br><i>ezrA</i> -R5-XbaI | GATC TCTAGA TGA TTA TCT AAG CGG ATA TGT CAG C |
|                                  | <b>ezrA TM::<i>zipA</i> TM swap</b>           |

|                                    |                                                           |
|------------------------------------|-----------------------------------------------------------|
| PLO 521 P1<br>w/EcoRI              | GATCGAATTCTCGCTTTTGCATTGATGTCACCCCATGAAAAA<br>ATAG        |
| PLO 522 P2                         | CAGACGCAAATCCTGCATCATAATGAGCCCCCTTGCTGTTTAC<br>CTTAATCTG  |
| PLO 523 P3                         | GTAAACAGCAAGGGGGCTCATTATGATGCAGGATTTGCGTCT<br>GATATT      |
| PLO 524 P4                         | CGGCGTAGATTTTTTTCCTGCTGGTCCAGAAACCATGTACCAG<br>TAAAGC     |
| PLO 525 P5                         | GTACATGGTTTCTGGACCAGCAGGAAAAAATCTACGCCGAA<br>ATCGACC      |
| PLO 526 P6<br>w/ XmaI              | GATC CCCGGG<br>CTAAGCGGATATGTCAGCTTTGATTTTTTCAACTG        |
| PLO 527 P7<br>w/HindIII            | GATC AAGCTT AACTTTCGGCATGTGGGCTGTGAC                      |
|                                    | <b>eza TM::cccA TM swap</b>                               |
| PLO 521 P1<br>w/EcoRI              | GATCGAATTCTCGCTTTTGCATTGATGTCACCCCATGAAAAA<br>ATAG        |
| PLO 1042 P2<br>eza Prom-<br>c550-R | AATAAGCGGGTTCCATTTTCATAATGAGCCCCCTTGCTGTTTAC<br>CTTAATCTG |
| PLO 1043 P3<br>c550 TM-F           | GTAAACAGCAAGGGGGCTCATTATGAAATGGAACCCGCTTATT<br>CCATTTTTG  |



|                                  |                                                            |
|----------------------------------|------------------------------------------------------------|
| PLO 1044 p4<br>c550 TM-R         | CGGCGTAGATTTTTTTCCTAAGTCCTTTTACTGATAAAAAGAAA<br>GTTAGACC   |
| PLO 1045 P5<br>N-ezrA-c550-<br>F | TTTTTATCAGTAAAAGGACTTAGGAAAAAAATCTACGCCGAA<br>ATCGACC      |
| PLO 527 P7<br>w/HindIII          | GATC AAGCTT AACTTTCGGCATGTGGGCTGTGAC                       |
|                                  | <b>ezrA TM::<i>ftsK</i> TM swap</b>                        |
| PLO 521 P1<br>w/EcoRI            | GATCGAATTCTCGCTTTTGCATTGATGTCACCCCATGAAAAAA<br>ATAG        |
| PLO 1081 P2-<br><i>ftsK</i>      | AGAGCAGCGCAATAGTTCCCATAAATGAGCCCCCTTGCTGTTA<br>CCTTAATCTG  |
| PLO 1082 P3-<br><i>ftsK</i>      | TAAACAGCAAGGGGGCTCATTATGGGAACTATTGCGCTGCTC<br>TGCGTT       |
| PLO 1083 P4-<br><i>ftsK</i>      | TCGGCGTAGATTTTTTTCCTGAGTTTTTTCAGCAATGGTCACCC<br>ATGACCAACC |
| PLO 1084 P5-<br><i>ftsK</i>      | GTGACCATTGCTGAAAAACTCAGGAAAAAAATCTACGCCGAAA<br>TCGACC      |
| PLO 527 P7<br>w/HindIII          | GATC AAGCTT AACTTTCGGCATGTGGGCTGTGAC                       |
|                                  | <b>ezrA TM::<i>sdhA</i> TM swap</b>                        |

|                               |                                                          |
|-------------------------------|----------------------------------------------------------|
| PLO 521 P1<br>w/EcoRI         | GATCGAATTCTCGCTTTTGCATTGATGTCACCCCATGAAAAA<br>ATAG       |
| PLO 1085 P2-<br><i>sdhA</i>   | GATAATGCTTGATTGACTCATAATGAGCCCCCTTGCTGTTAC<br>CTTAATCTG  |
| PLO 1086 P3-<br><i>sdhA</i>   | TAAACAGCAAGGGGGCTCATTATGAGTCAATCAAGCATTATCG<br>TAGTCGGCG |
| PLO 1087 P4-<br><i>sdhA</i>   | TCGGCGTAGATTTTTTTCCTCGCCATTCTGATTCCGCTGCTT<br>TAATTGTC   |
| PLO 1088 P5-<br><i>sdhA</i>   | GCAGCGGAATCAGGAATGGCGAGGAAAAAATCTACGCCGAA<br>ATCGACC     |
| PLO 527 P7<br>w/HindIII       | GATC AAGCTT AACTTTCGGCATGTGGGCTGTGAC                     |
|                               | <b><i>eZR</i> TM deletion</b>                            |
| PLO 1113<br>pJQ43-F1          | TGCCACCTGACGTCTAAGAA                                     |
| PLO 1114<br>pJQ43-F2          | AAGTTGGCCGCAGTGTTATC                                     |
| PLO 1115<br>pJQ43-F2-<br>SpeI | GATC ACTAGT AAGTTGGCCGCAGTGTTATC                         |
| PLO 669                       | GATCGGATCCCTAAGCGGATATGTCAGCTTTG                         |
|                               | <b>cloning <i>eZR</i>(QNR) to TOPO vector</b>            |
| PLO 1116 F5-<br><i>eZR</i>    | CTTGTCGAGCAGGTCATCCT                                     |

|         |                             |
|---------|-----------------------------|
| PLO 141 | AGCGGATATGTCAGCTTTGATTTTTTC |
|---------|-----------------------------|

Figure S1

A

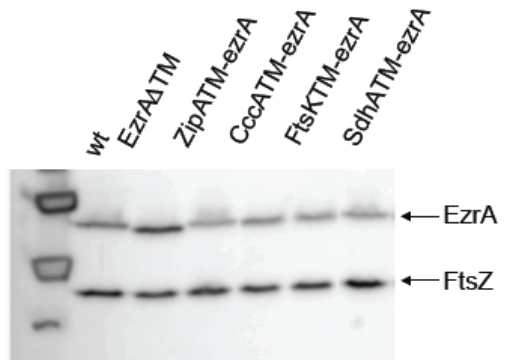

B

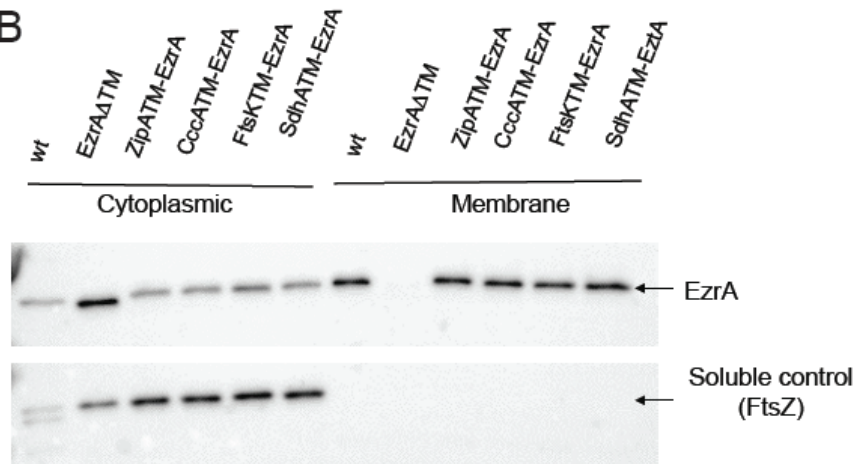

Figure S2

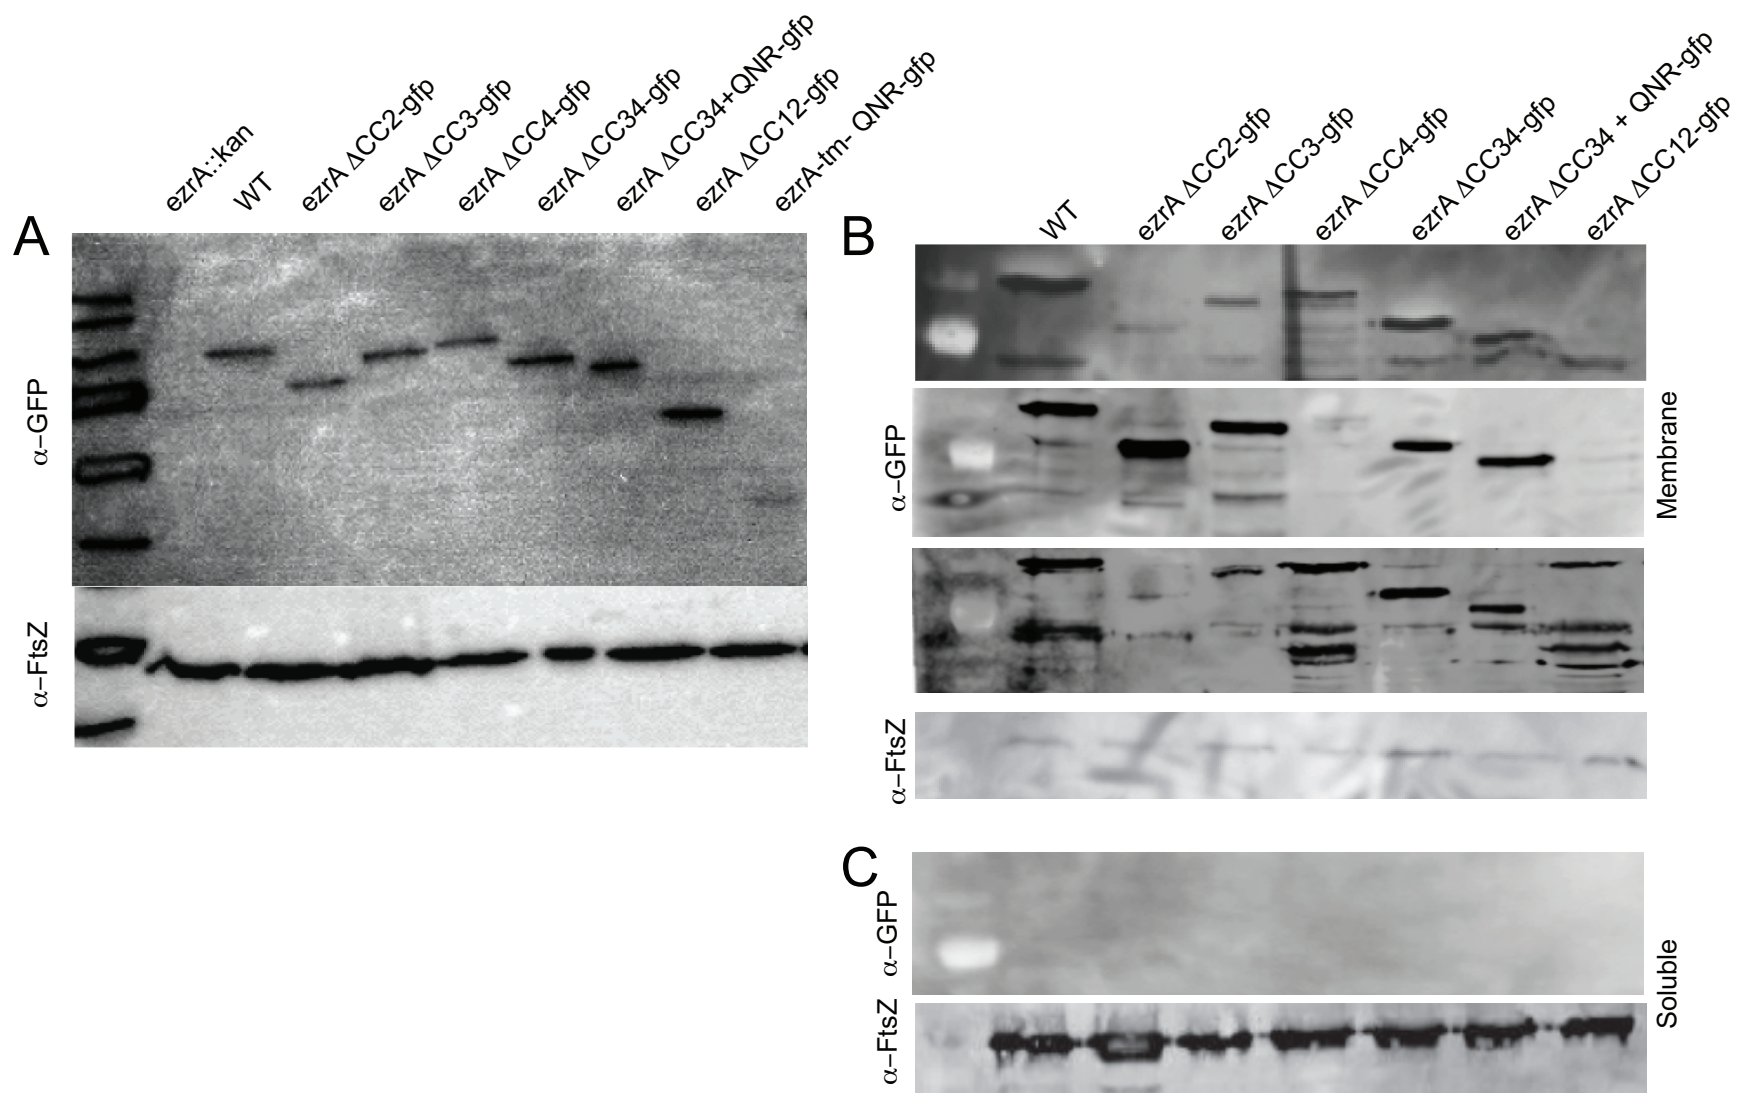

Figure S3

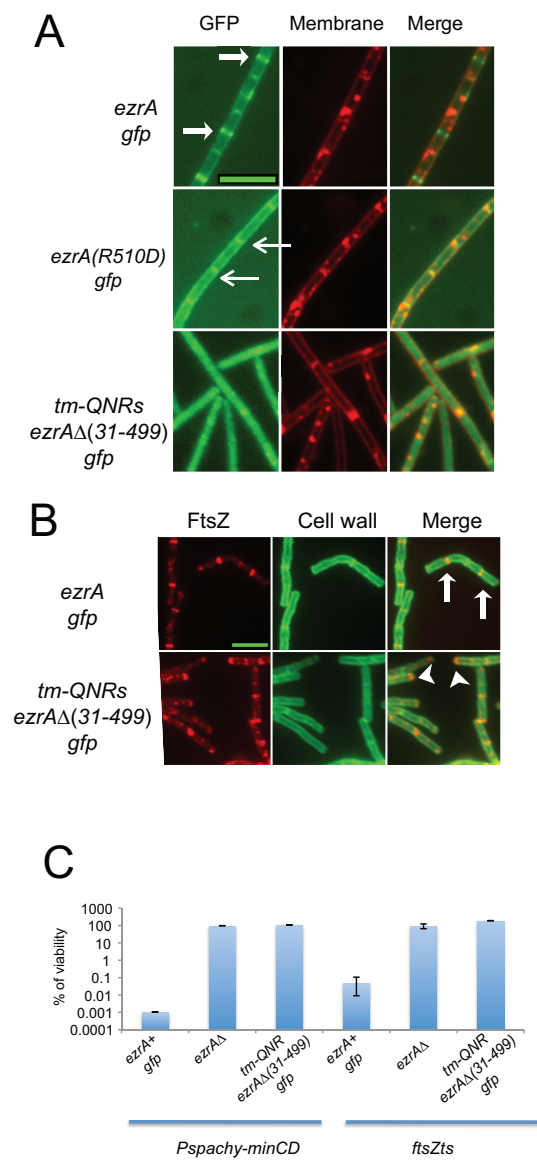

Supplement: pone.0102616.s001.pdf [file pone.0102616.s001.pdf]
